# Supplementary material for: Impaired activation of lesional CD8+ T-cells is associated with enhanced expression of Programmed Death-1 in Indian Post Kala-azar Dermal Leishmaniasis
Source: PubMed Central journal article supplement (PMC6345993; doi:10.1038/s41598-018-37144-y), 2019-01-24
Supplement: 41598_2018_37144_MOESM1_ESM.pdf [file 41598_2018_37144_MOESM1_ESM.pdf]

# **Impaired activation of lesional CD8<sup>+</sup> T-cells is associated with enhanced expression of Programmed Death-1 in Indian Post Kala-azar Dermal Leishmaniasis**

**Shibabrata Mukherjee<sup>1</sup>, Ritika Sengupta<sup>1</sup>, Debanjan Mukhopadhyay<sup>#1</sup>, Claudia Braun<sup>2</sup>, Sneha Mitra<sup>1</sup>, Susmita Roy<sup>1</sup>, Nilay Kanti Das<sup>3</sup>, Uttara Chatterjee<sup>4</sup>, Esther von Stebut<sup>5</sup> and Mitali Chatterjee<sup>1\*</sup>**

<sup>1</sup>Dept. of Pharmacology and <sup>4</sup>Pathology, Institute of Postgraduate Medical Education and Research, Kolkata-700020, India

<sup>2</sup>Dept. of Dermatology, University Medical Center, Johannes Gutenberg University, Mainz-55131 Germany

<sup>3</sup>Dept. of Dermatology, Calcutta Medical College, Kolkata-700073, India

<sup>5</sup>Klinik für Dermatologie und Venerologie, Universitätsklinikum Köln, 50937 Köln, Germany

<sup>#</sup>Present address: Department of Pathology, Microbiology, Immunology. School of Veterinary Medicine, University of California, Davis, USA.

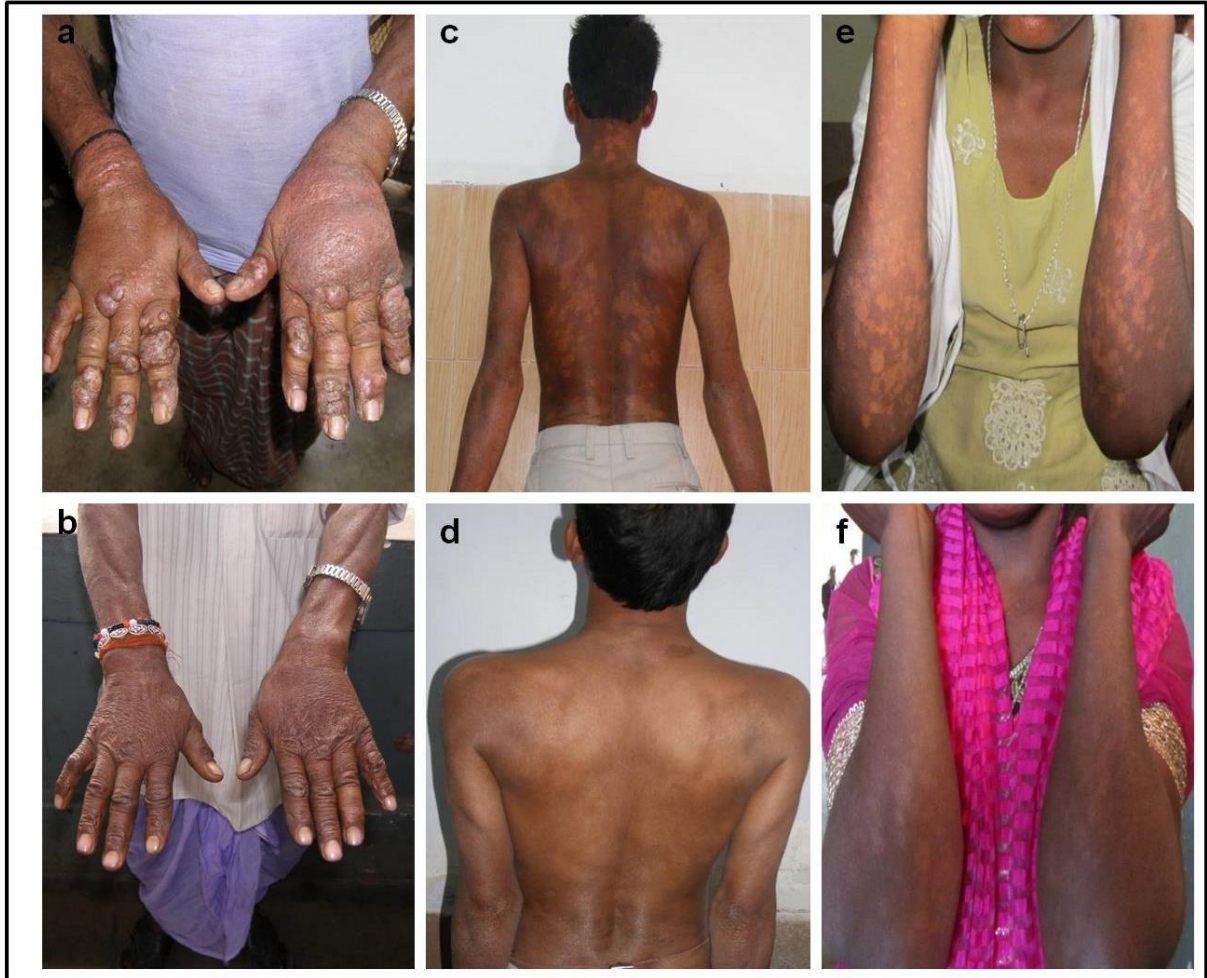

**Supplementary Figures S1, a-f: Distribution of lesions in patients with PKDL at disease presentation and post treatment**

**a & b:** Representative profile of a patient with polymorphic PKDL at disease presentation and after completion of treatment

**c-f:** Representative profiles of two patients with macular PKDL at disease presentation (**c, e**) and after completion of treatment (**d, f**)

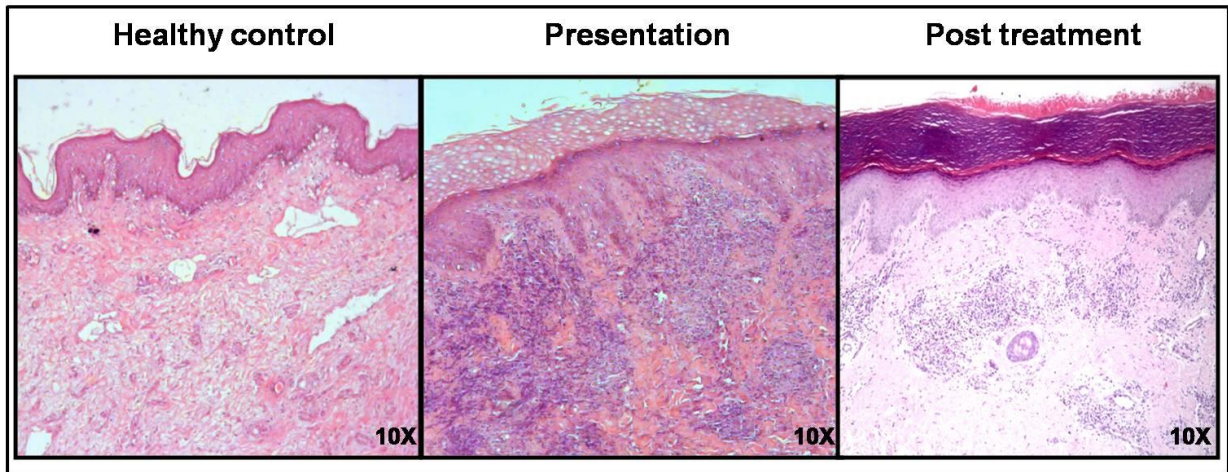

**Supplementary Figure S2: Representative profile of H&E-stained sections of a healthy control along with a patient with PKDL at disease presentation and post-treatment (10X magnification)**

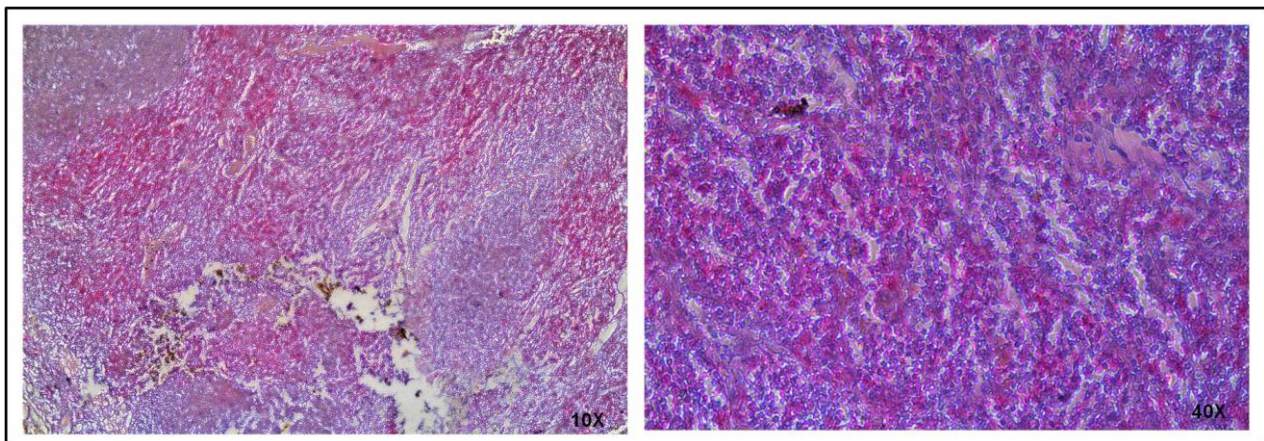

**Supplementary Figure S3: Representative profile of human lymph node (positive control) showing presence of CD4<sup>+</sup> T-cells (10X and 40X magnification)**

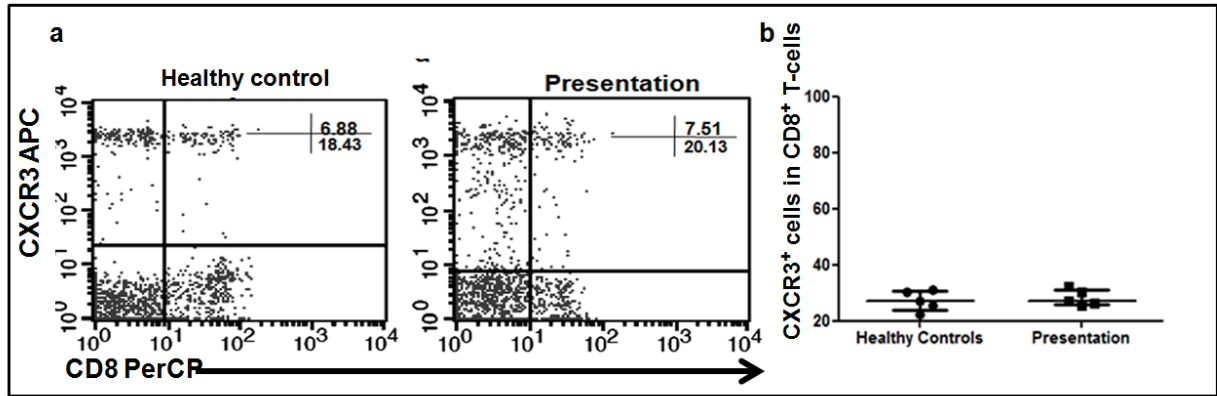

**Supplementary Figures S4 a & b: Status of CXCR3<sup>+</sup> in CD8<sup>+</sup> T-cells in peripheral blood of patients with PKDL**

**a.** Representative quadrant plots showing frequency (%) of CXCR3<sup>+</sup> in CD8<sup>+</sup> T-cells of a healthy control and patient with PKDL.

**b.** Scatter plots showing the frequency (%) of CXCR3<sup>+</sup> in CD8<sup>+</sup> T-cells of healthy controls (●, n=5) and patients with PKDL at presentation (■, n=5). The proportion of CXCR3<sup>+</sup> in the entire CD8<sup>+</sup> T-cell population was calculated by dividing the percentages of upper right quadrant by the sum of upper and lower right quadrant. Each horizontal bar represents the median value.

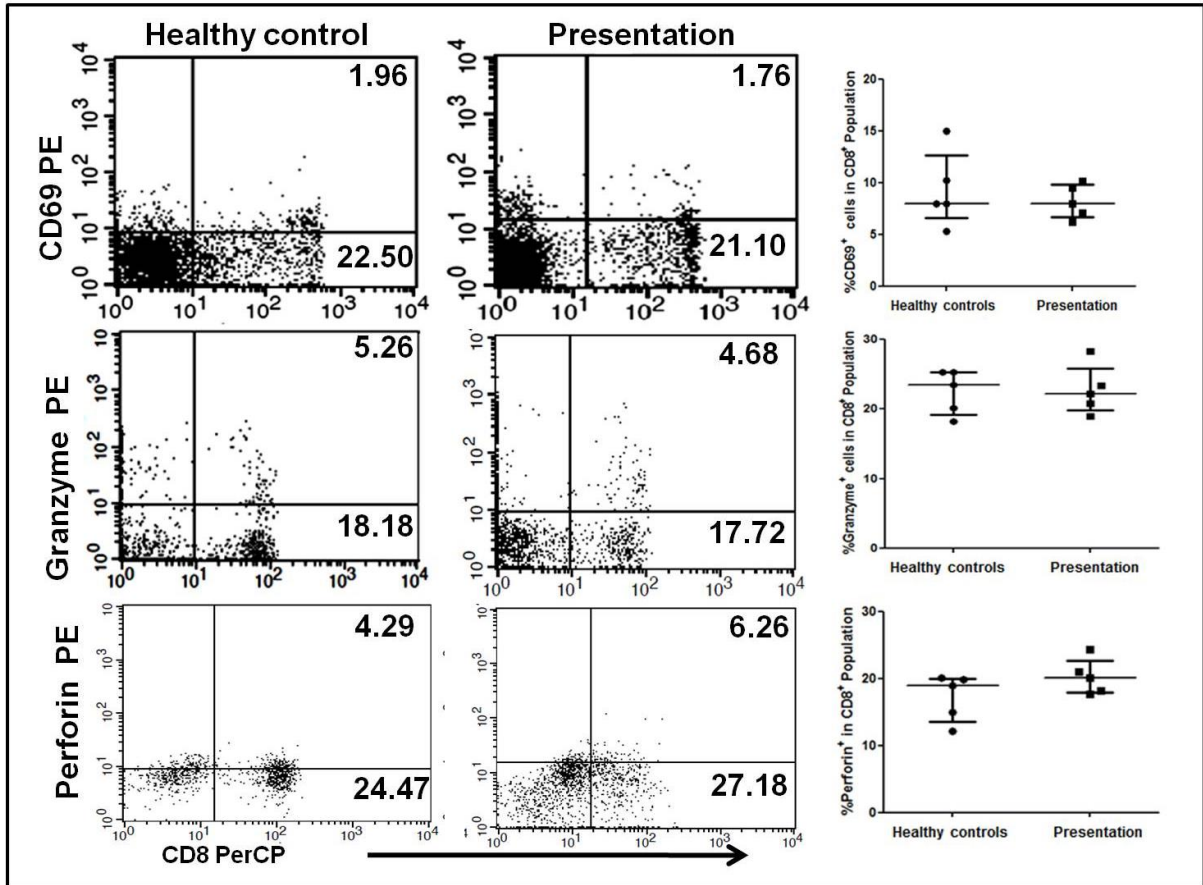

**Supplementary Figure S5: Status of CD69, Granzyme and Perforin in CD8<sup>+</sup> T-cells in peripheral blood of patients with PKDL**

Representative quadrant plots indicating frequency (%) of CD69<sup>+</sup>, Granzyme and Perforin along with scatter plots within CD8<sup>+</sup> T-cells of healthy controls (●, n=5) and patients with PKDL (■, n=5).

The proportion of CD69<sup>+</sup>, Granzyme<sup>+</sup> and Perforin<sup>+</sup> in the entire CD8<sup>+</sup> T-cell population was calculated by dividing the percentages of upper right quadrant by the sum of upper and lower right quadrant. Each horizontal bar represents the median value.

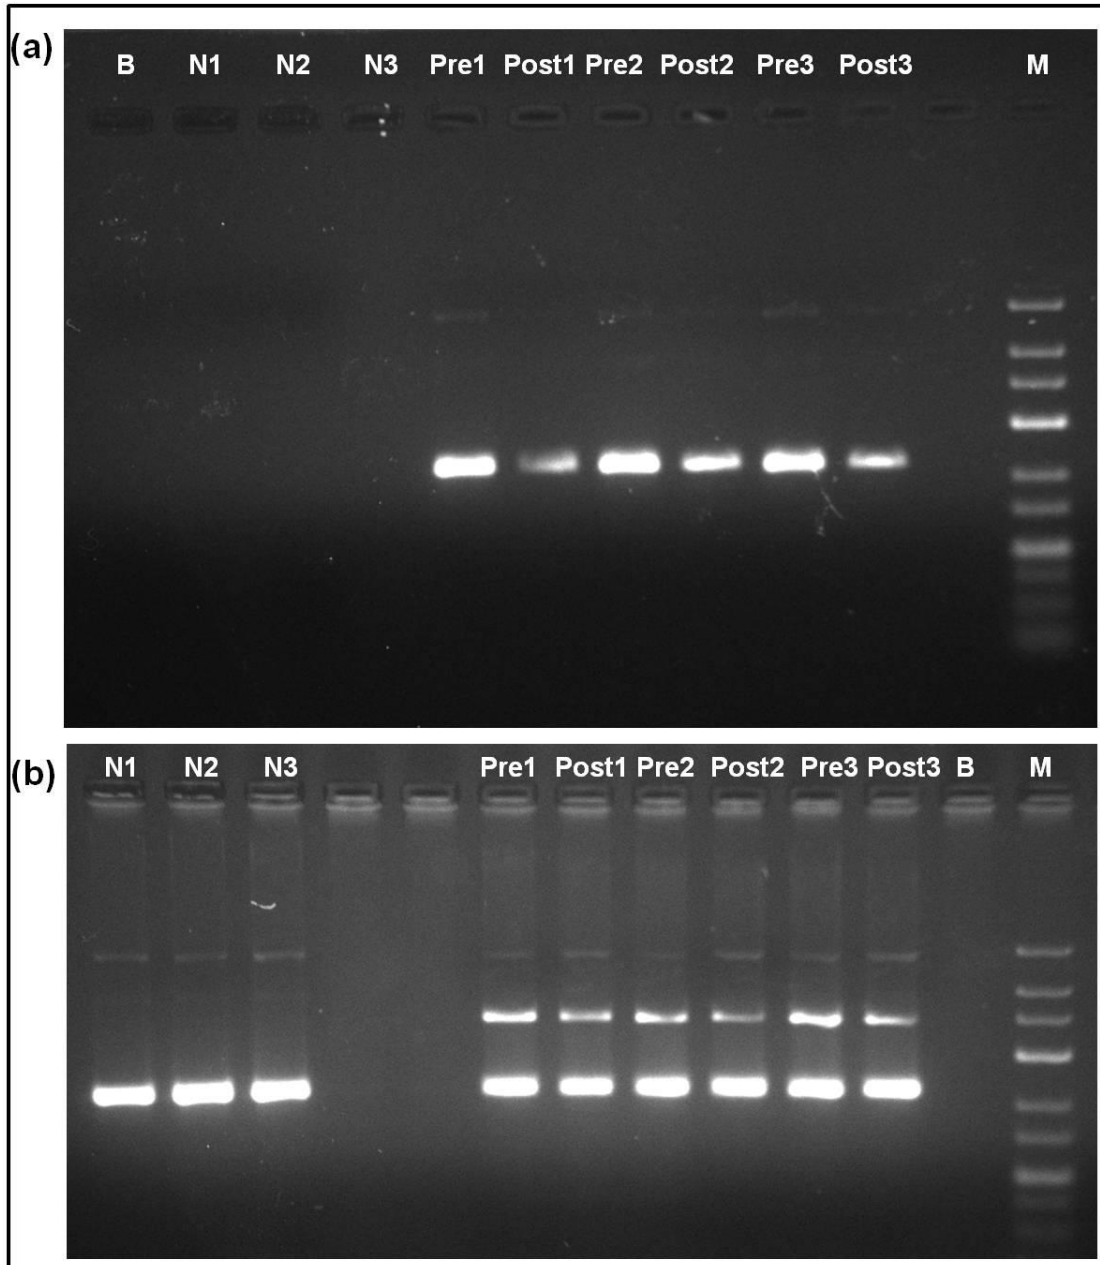

**Supplementary Figure S6 a & b: Full length gel images showing mRNA expression of PD-1 in dermal biopsies of patients with PKDL**

**a.** Full-length gel image for mRNA expression profile of PD-1 in dermal biopsies of healthy controls (N1-3), patients with PKDL (Pre1-3) and post treatment (Post1-3); B- Blank, M- Molecular weight marker

**b.** Full-length gel image for mRNA expression profile of  $\beta$ -actin in dermal biopsies of healthy controls (N1-3), patients with PKDL (Pre1-3) and post treatment (Post1-3); B- Blank, M- Molecular weight marker

Samples were derived from the same experiment and run in two different gels (PD-1 and  $\beta$ -actin) and the gels were processed in parallel under same experimental conditions
